# Supplementary material for: Tropical Cyclone Disturbances Induce Contrasting Impacts on Forest Structure, Plant Composition, and Soil Properties in Temperate Broadleaf and Coniferous Forests
Source: MDPI journal article supplement (doi:10.3390/f13071033), 2022-06-30

Supplementary Information for

**Contrasting impacts of tropical cyclone disturbances in temperate broadleaf and coniferous forests**

Černý, T., Doležal, J., Petřík, P., Šrůtek, M., Song, J.S., Altman, J.

Corresponding author: Altman, J.

Email: [altman.jan@gmail.com](mailto:altman.jan@gmail.com)

**This PDF file includes:**

Supplementary Table

Supplementary Figures

**Table S1.** The strongest predictors related to the respective response variable from multiple linear regressions in both pre-disturbance and post-disturbance forests. Up/down arrow shows the positive/negative relationship between variables. The horizontal bar indicates no significant relationship. Abbreviations: altit – altitude, cover3 – total cover of the tree layer, Pcon – a fraction of basal area of conifers, BA<sub>tot</sub> – total tree basal area, Mg – soil magnesium, ΔpH – potential soil acidity. Significance of individual models is indicated using standard codes: \*:  $p < 0.05$ ; \*\*:  $p < 0.01$ ; \*\*\*:  $p < 0.001$ .

| Response                                             | Pre-disturbance |        |                    | Post-disturbance  |        |                    |
|------------------------------------------------------|-----------------|--------|--------------------|-------------------|--------|--------------------|
|                                                      | Predictor       | Change | R <sup>2</sup> (%) | Predictor         | Change | R <sup>2</sup> (%) |
| <i>Geographical and canopy structural predictors</i> |                 |        |                    |                   |        |                    |
| Number of woody species in E3 layer                  | altit           | ↓      | 43.7 *             | altit             | ↓      | 48.8 **            |
| Number of woody species in E2 layer                  | —               |        |                    | —                 |        |                    |
| Number of herbaceous species                         | altit           | ↑      | 65.4 **            | altit             | ↑      | 51.8 **            |
| Number of species of woody juveniles                 | cover3          | ↓      | 45.7 ***           | BA <sub>tot</sub> | ↑      | 18.0 *             |
| Simpson index for herbaceous species                 | Pcon            | ↑      | 70.6 **            | altit             | ↑      | 54.1 **            |
| Total cover of graminoids                            | altit           | ↑      | 52.6 **            | altit             | ↑      | 64.2 **            |
| <i>Soil predictors</i>                               |                 |        |                    |                   |        |                    |
| Number of woody species in E3 layer                  | —               |        |                    | —                 |        |                    |
| Number of woody species in E2 layer                  | —               |        |                    | —                 |        |                    |
| Number of herbaceous species                         | Mg              | ↓      | 74.7 **            | ΔpH               | ↓      | 40.7 *             |
| Number of species of woody juveniles                 | Mg              | ↓      | 46.6 *             | —                 |        |                    |
| Simpson index for herbaceous species                 | Mg              | ↓      | 77.3 **            | ΔpH               | ↓      | 41.9 *             |
| Total cover of graminoids                            | Mg              | ↓      | 60.2 **            | —                 |        |                    |

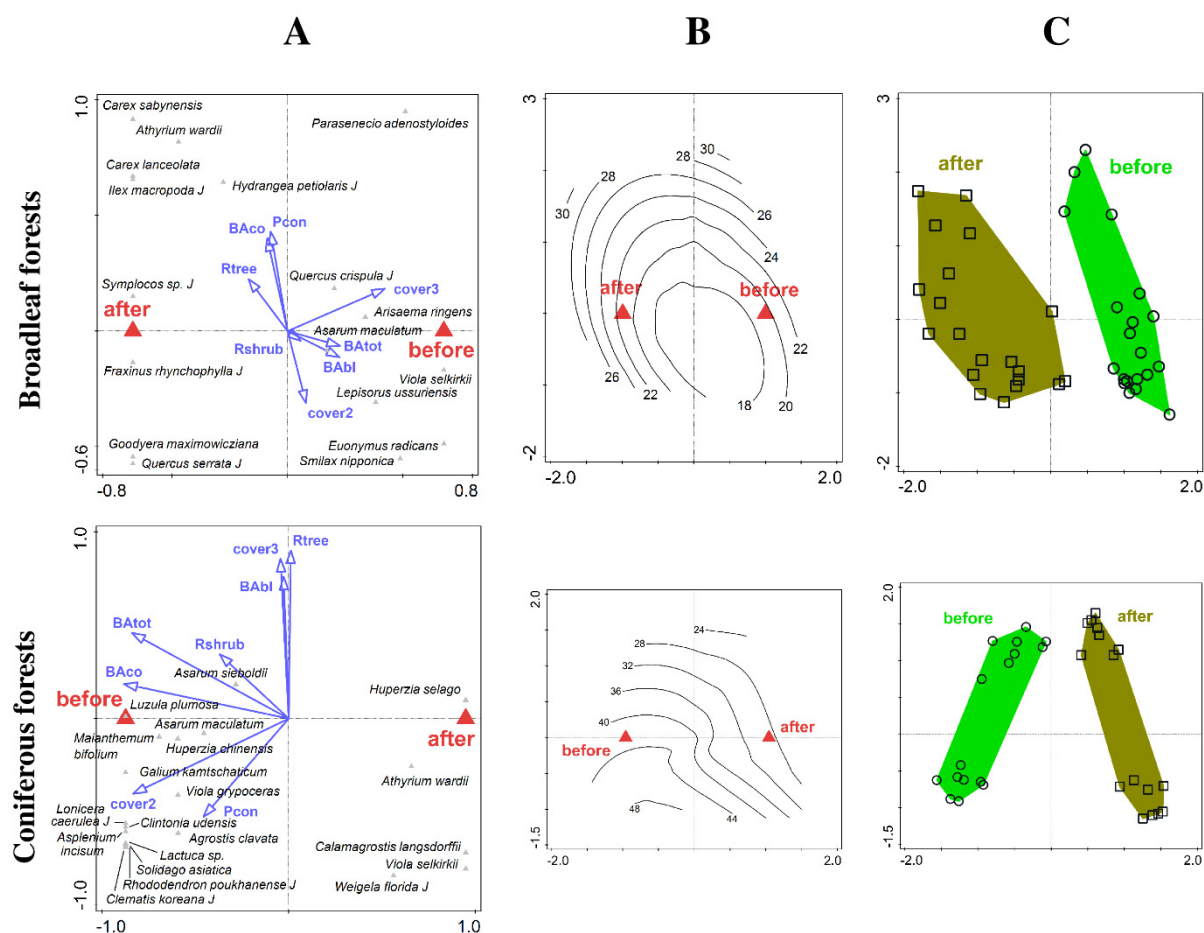

**Figure S1.** CCA ordination diagrams showing temporal shifts (*before* and *after* typhoon disturbance) in herbs (no suffix) and woody juveniles (*J* suffix) separately in broadleaf forests (time explains 4.4% of the total species variability,  $p = 0.001$ ) and coniferous forests (time explains 7.9% of the total species variability,  $p = 0.002$ ). Blue arrows represent supplementary variables (see Table 1 for abbreviations). **(A)** Ordination of species showing species compositional shifts – only the subset of best fitting species is shown, **(B)** contour plot with the loess smoothed species richness isolines, **(C)** classified diagram of plots.

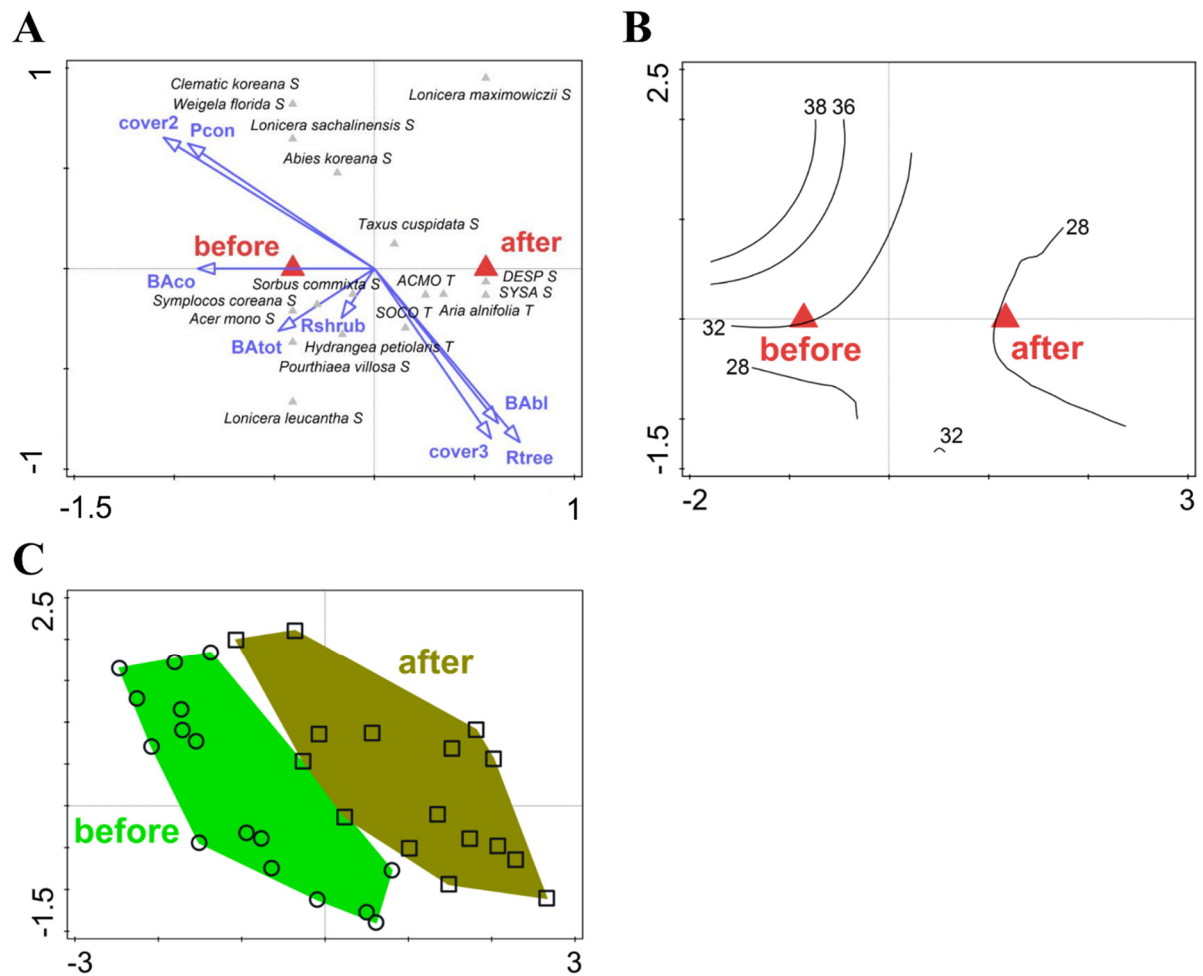

**Figure S2.** CCA ordination diagrams showing vegetation change in coniferous forests, based on field records made on permanent plots *before* and *after* typhoon disturbance. Here only subset of woody species occurring in shrub and tree layers were analyzed, constrained by the categorical temporal variable. Observed difference is marginally significant at  $p = 0.052$ , time explains 2.16% of the total species variability. Three types of results are presented: **(A)** Ordination of species showing species compositional shifts, blue arrows represent supplementary variables (see Table 1 for abbreviations); **(B)** contour plot with the modelled species richness; **(C)** classified diagram of plots. In **A** some species are abbreviated to prevent text clumpiness: *ACMO* = *Acer mono*, *DESP* = *Deutzia* sp., *SOCO* = *Sorbus commixta*, *SYSA* = *Symlocos sawafutagi*; S or T following species name stands for the shrub or tree layer, respectively.

**Figure S3.** Two photographs of stands of *Abies koreana*-dominated subalpine forest on Mt. Halla, severely perturbed by two typhoons that hit Jeju Island in late summer 2012. The prevalence of uprooted individuals (not snapped) is remarkable. Photos taken 9-29-2017 by Černý T. (first photo) and Altman J. (second photo).

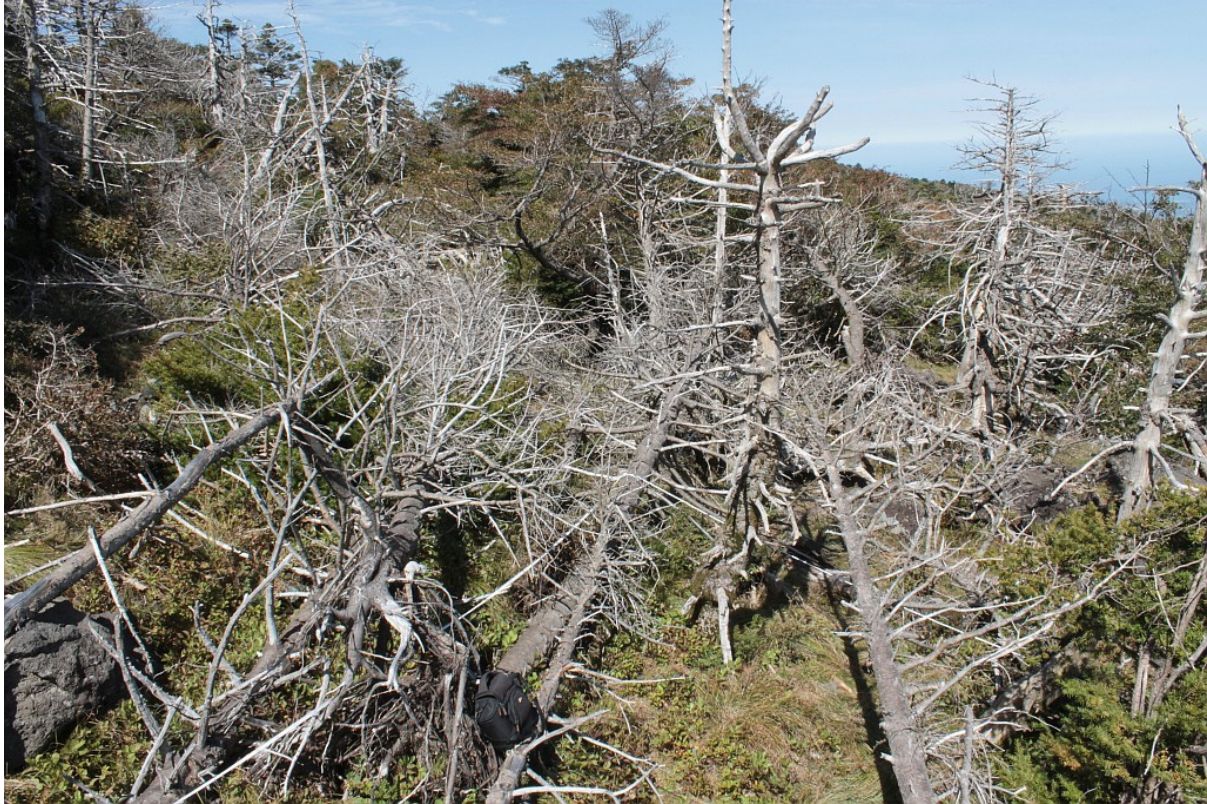



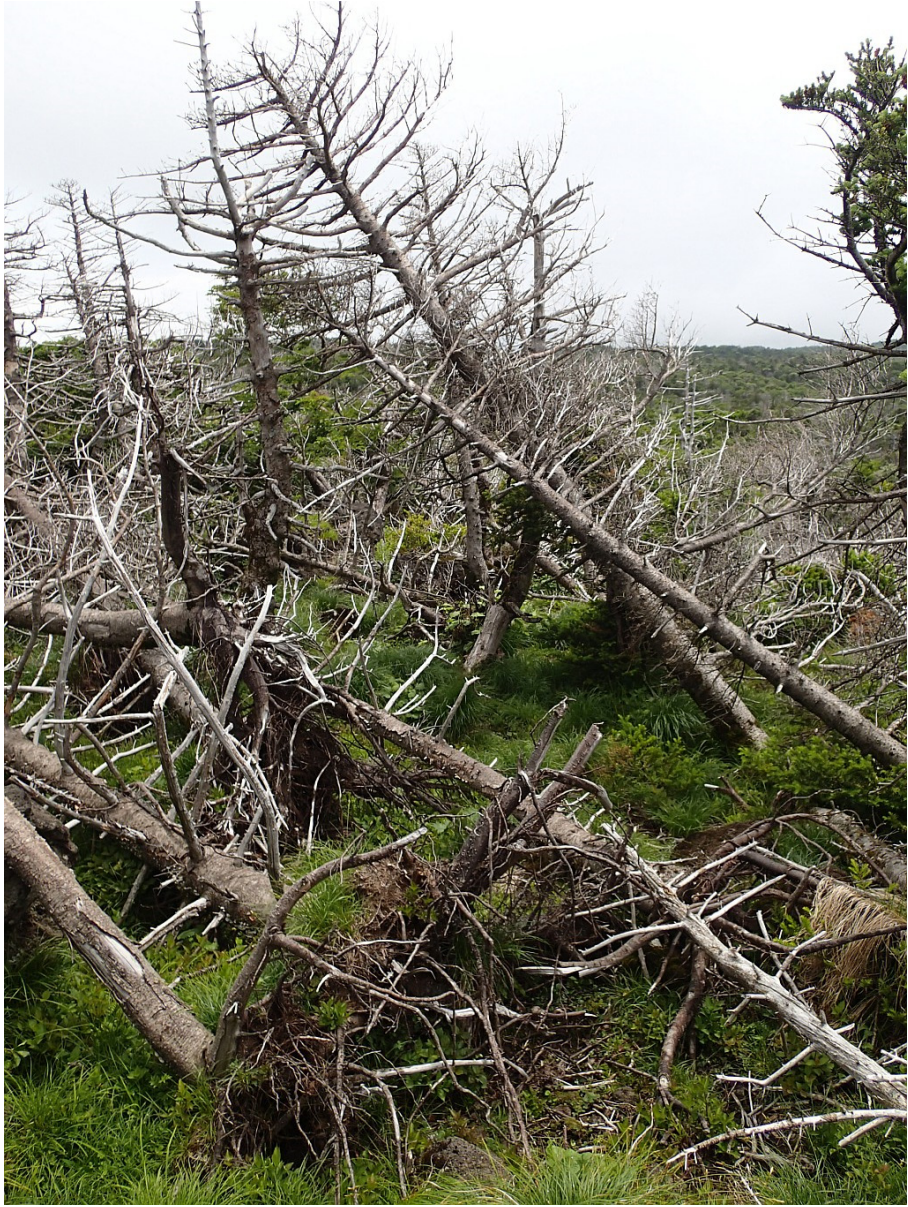

Supplement: s1 [file s1]
